# Supplementary material
Source: HighWire-hosted journal article supplement (https://bjsm.bmj.com/content/55/17/947)
Supplement: inline-supplementary-material-1 [file inline-supplementary-material-1.pdf]

**Supplementary table 1.** An example of local tissue and sport-specific loading for a runner with Achilles tendinopathy.

|                                                                                                                                                                   | <i>Features of AT</i>                          | <i>How to address it?</i>                                    | <i>Example</i>                                | <i>Aim or target</i>                                                                                   | <i>How to quantify it clinically?</i>           |
|-------------------------------------------------------------------------------------------------------------------------------------------------------------------|------------------------------------------------|--------------------------------------------------------------|-----------------------------------------------|--------------------------------------------------------------------------------------------------------|-------------------------------------------------|
| <b>Local Tissue Capacity</b>                                                                                                                                      | ↓ Tendon stiffness                             | HSR, isometrics                                              | 3 x 8reps x 80%BW or 4 x 45" holds            | Recover "normal" tendon stiffness                                                                      | N/A                                             |
|                                                                                                                                                                   | ↓ Strength                                     | HSR                                                          | 3 x 8reps x 80%BW                             | 1.5BW in a 6RM seated calf raise test                                                                  | 6RM test                                        |
|                                                                                                                                                                   | ↓ Endurance                                    | Endurance sets                                               | Heel raises to endurance                      | 25 SL heel raises                                                                                      | Heel raises to endurance test                   |
|                                                                                                                                                                   | ↓ Power<br>↓ Energy storage & release capacity | SSC activity retraining                                      | Plyometric (pogos, drop jumps, maximal jumps) | Distance in SL triple maximal jump similar to contralateral limb<br>Reduce contact time during hopping | Distance<br>Reactive strength index             |
| <b>Local load progression criteria:</b> Pain control + other main criteria like such as:                                                                          |                                                |                                                              |                                               |                                                                                                        |                                                 |
| a) <b>Conditioning stages:</b> predefined stages prior to starting rehabilitation, such as increase in the percentage of RM or in the complexity of the exercises |                                                |                                                              |                                               |                                                                                                        |                                                 |
| b) <b>Fatigue:</b> extra sets or reps are added, or weight is increased if there are no signs of fatigue                                                          |                                                |                                                              |                                               |                                                                                                        |                                                 |
| c) <b>Subjective perception:</b> arbitrary increase according to the subjective perception of the athlete                                                         |                                                |                                                              |                                               |                                                                                                        |                                                 |
| d) <b>Temporary linear increase:</b> a linear increase in time (i.e. 2.5% each week)                                                                              |                                                |                                                              |                                               |                                                                                                        |                                                 |
| <b>Sport-Specific Capacity</b>                                                                                                                                    | Aerobic capacity                               | Extensive conditioning (bike, row, elliptical, running pool) | 6x 4 mins (2-4 mins recovery between bouts)   | Maintain aerobic capacity                                                                              | Power output, distance, heart rate, session-RPE |
|                                                                                                                                                                   |                                                | Intensive conditioning (bike, row, elliptical, running pool) | (4x) 8x15s:15s                                |                                                                                                        |                                                 |
|                                                                                                                                                                   | Anaerobic capacity                             | Intensive conditioning (bike, row, elliptical, running pool) | (12x) 30s:120s<br>(8x) 60s:180s               | Maintain anaerobic capacity                                                                            | Power output, distance, heart rate, session-RPE |
|                                                                                                                                                                   |                                                | Gym-based conditioning                                       | Full-body circuits                            |                                                                                                        |                                                 |
|                                                                                                                                                                   | Kinetic chain & general strengthening          | Strength training with maximal force and power emphasis      | Upper and lower body<br>4x 3-5 reps           | Maintain strength and power                                                                            | Volume load, force transducers, session-RPE     |
|                                                                                                                                                                   | Sport-specific technical & tactical training*  | Low level skills                                             | Running technique drills                      | Maintain the technical skills to facilitate performance                                                | Distance, heart rate, session-RPE               |
| On-field training*                                                                                                                                                | Run                                            | Short runs progressed in speed, volume and frequency         | Progressively get back to running             | Distance, heart rate, session-RPE                                                                      |                                                 |

Abbreviations: AT, Achilles tendinopathy; HSR, heavy slow resistance; reps, repetitions; BW, body-weight; RM, repetition maximum; SL, single legged; SSC, stretch-shortening cycle; \* Based on pain tolerance
